# Supplementary material for: Systemic immune-inflammation index as an independent risk factor for diabetic nephropathy: a retrospective, single-center study
Source: PeerJ. 2024 Nov 18;12:e18493. doi: 10.7717/peerj.18493 (PMC11639188; doi:10.7717/peerj.18493)
Supplement: Data S1 [file peerj-12-18493-s003.xlsx]

## Sheet: Sheet1
NO.	DM duration	Diabetic Retinopathy	Use of insulin	CRP	PCT	Grade of hematuria	Urine RBC count	sex	age	weight	height	height	BMI	smoking	DM	HT	SII	SII4categories	SIRI	SIRI4	WBC	WBC4	N	N4	L	L4	M	M4	HGB	PLT	PLT4	Tbil	Alb	BUN	CR	UA	GLU	TCHO	TG	HDL	LDL	Ca	Correcting calcium	P	GFR	PTH	caculate-PTH	ACR	Hba1c
1	9	1	1	14.25	0.83	3	178	1	59					1	1	1	3177.63	4	5.48323	4	9.99	4	8.39	4	1.27	2	0.83	4	49	481	1	28.1	19.7	28.8	465	347	2.84	24.51	7.02	0.16	21.5	2.01	2.416	2.25	19.48	4.27	38.8143	4166.26	4.2
2	13	1	1	5	-	1	35.64	1	58	59	169	1.69	20.6575	1	1	1	1495	4	1.70857	4	6.67	3	4.83	3	1.47	2	0.52	4	94	455	1	4	28.4	6.83	138.8	432.3	8.09	5.15	2.51	0.89	3.89	2.35	2.582	1.34	56.83	1.21	10.9989	3606.14	7.5
3	6	0	0	5	-	2	120.1	1	51	62.5	160	1.6	24.4141	1	1	1	2157.73	4	2.01979	4	6.13	2	4.68	3	0.95	1	0.41	3	84	438	1	5.4	25.6	9.2	89.2	329.2	6.28	5.8	0.52	2.46	3.88	2.01	2.298	1.13	53.49		0	7771.46	15.3
4	12	1	0	9.18	-	0	6.60	0	52	47	145	1.45	22.3543	0	1	0	1232.33	4	1.3725	3	7.71	3	5.49	4	1.88	3	0.47	4	101	422	1	3.8	20.7	8.69	161.2	399.4	6.78	8.48	3.63	1.04	5.33	2.11	2.496	1.44	34.71	2.91	26.4519	7112.44	8.9
5	6	0	1	5	0.06	2	43.6	1	53	70	166	1.66	25.4028	1	1	1	786.585	3	0.74278	2	7.98	4	4.59	3	2.41	4	0.39	3	87	413	1	5.4	38.6	11.4	235	567	6.07	5.28	3.47	0.76	2.91	2.29	2.318	1.34	39.61	3.13	28.4517	30.88	10.4
6	20	0	1	-	-	1	34	1	58	62	165	1.65	22.7732	1	1	1	1061.92	4	1.11918	3	6.81	3	3.8	2	1.46	2	0.43	3	107	408	1	3.5	26.2	12	132.9	315.7	6.7	5.58	1.62	1.73	3.37	2.06	2.336	0.99	33.8	3.23	29.3607	19020.9	7.3
7	1	0	0	-	0.46	2	121	1	46	65	165	1.65	23.8751	1	1	1	934.689	4	0.974118	3	7.72	3	5.52	4	2.38	4	0.42	3	80	403	1	4.6	30.7	7.83	61	379.2	3.83	3.98	0.73	1.42	2.13	2	2.186	1.51	99.77	2.79	25.3611	2695.84	7.8
8	13	0	0	5	-	0	2.6	1	77	64	162	1.62	24.3865	0	1	0	440.489	2	0.668404	2	3.92	1	2.06	1	1.88	3	0.61	4	96	402	1	4.8	33.7	5.89	105	408	3.38	9.21	1.76	2.04	5.99	2.15	2.276	1.44	73.28	5.9	53.631	5340.97	11.7
9	21	0	0	5	-	0	2.5	0	64	65	150	1.5	28.8889	0	0	1	999.97	4	1.11402	3	6.63	3	4.35	3	1.64	3	0.42	3	116	377	1	20.7	40.9	4.5	49.1	324	10.1	2.72	1.67	1.13	1.25	2.05	2.032	0.86	122.87	5.44	49.4496	19.23	7.2
10	13	0	0	40.3	-	0	5.8	0	66	46.5	148	1.48	21.229	0	0	1	926.131	4	1.42861	4	9.31	4	6.01	4	2.44	4	0.58	4	129	376	1	4.1	36.1	2.58	39.6	185.7	7.72	4.32	1.54	0.84	2.9	2.14	2.218	0.99	105.76	2.07	18.8163	2446.77	7.1
11	0.1	0	0	37.42	-	1	12.8	0	66	63	158	1.58	25.2363	0	0	1	499.224	2	0.82981	2	7.56	3	3.52	2	2.63	4	0.62	4	121	373	1	11.4	43.5	2.62	50.8	341.7	6.16	6.1	1.24	1.23	3.95	2.37	2.3	1.26	103.13	4.26	38.7234	17.89	6.4
12	12	0	1	-	0.21	2	125.2	1	73	60	167	1.67	21.5139	1	1	1	752.686	3	0.88058	2	6	2	4.34	3	2.07	4	0.42	3	116	359	1	5.2	24	7.65	84	361	4.96	9.03	2.33	1.25	6.39	2.04	2.36	1.17	78.06	3.59	32.6331	3522.41	9.9
13	10	0	0	-	0.01	1	13.8	0	62	44.5	158	1.58	17.8257	0	1	1	773.256	3	1.2593	3	5.71	2	3.8	2	1.72	3	0.57	4	94	350	1	5.2	51.5	10.28	142.8	252.4	5.56	3.83	2.09	0.77	2.78	2.58	2.35	1.52	45.61	4.54	41.2686	23.21	5.8
14	13	0	1	5	-	1	18.7	0	60	63.5	163	1.63	23.9	0	1	1	885.342	4	0.995355	3	5.5	1	4.06	2	1.55	2	0.38	3	98	338	1	2	19.3	8.44	86	475	7.4	6.17	1.93	0.25	4.09	1.96	2.374	1.07	64.87	2.92	26.5428	4094.95
15	20	1	1	1.27	0.05	0	13	1	51	57	168	1.68	20.1956	1	1	1	685.299	3	0.59502	1	7.28	3	5.15	4	2.51	4	0.29	2	85	334	1	4.4	27.8	16.45	237.6	398	4.87	7.27	1.68	1.55	5.3	1.94	2.184	1.86	43.34	17.72	161.075	6545.83	6.4
16	9	0	1	-	-	2	23.1	1	64	64	168	1.68	22.6757	1	1	1	2257.62	4	2.40172	4	9.18	4	5.97	4	0.87	1	0.35	2	78	329	1	2.3	34.9	8.35	103	317	8.2	3.09	1.58	0.46	2.31	1.78	1.882	0.71	67.23	10.24	93.0816	4847.21	6.8
17	10	0	1	1.71	-	1	9.24	0	42	50	156	1.56	20.5457	0	1	1	333.559	1	0.640678	2	6.12	2	4.2	3	4.13	4	0.63	4	106	328	1	7.4	18	8.23	85	268	5.7	6.86	4.31	1.1	4.32	2.28	2.72	1.1	61.44	1.67	15.1803	924.04
18	5	0	0	16.8	-	0	2.6	1	76	75	170	1.7	25.9516	0	1	1	1130.56	4	0.898915	2	5.96	2	4.46	3	1.29	2	0.26	1	104	327	1	8.6	25.9	6.5	47	293	2.09	8.15	1.76	1.44	5.74	2.15	2.432	1.75	123.43	1.02	9.2718	4937.77	9.4
19	11	0	1	26.16	0.07	1	7.8	0	63	60	166	1.66	21.7738	0	1	1	1671.57	4	1.68691	4	8.69	4	7.77	4	1.52	2	0.33	2	104	327	1	6.3	35.8	18.98	240.3	641.1	3.9	4.24	1.76	1.26	4.05	2.44	2.524	1.74	54.91	1.98	17.9982	254.23	8.5
20	4	1	1	6.19	0.01	0	5.5	1	57			0	#DIV/0!	1	1	1	1982.72	4	1.45967	4	6.39	3	3.71	2	0.61	1	0.24	1	92	326	1	3.2	27.6	5.11	155	258	3.45	4.36	0.89	1.43	2.69	2.07	2.318	1.3	33.36		0	3732.74
21	13	1	0	11.6	0.01	0	46.3	0	57	53	160	1.6	20.7031	0	1	1	788.919	3	2.2365	4	8.36	4	6.39	4	2.6	4	0.91	4	157	321	1	8.5	41.3	6.14	99	390	7.54	5.01	2.15	1.31	3.26	2.55	2.524	0.87	79.08		0	248.8
22	14	0	1	-	-	1	9	0	62	70	160	1.6	27.3438	0	1	1	1907.21	4	3.22851	4	8.83	4	5.62	4	0.94	1	0.54	4	68	319	1	6.3	23	15.8	159	328	5.26	7.24	1.17	1.32	4.32	2.05	2.39	1.6	34.13	4.26	38.7234	6215.48	8.4
23	0.5	1	0	5	0.01	1	23	1	65			0	#DIV/0!	0	1	1	832.955	3	1.15252	3	5.67	2	4.06	2	1.55	2	0.44	3	128	318	1	6.9	34.9	14.01	112	552	3.39	4.43	1.09	1.07	3.06	2.15	2.252	1.17	74.41	9.8	89.082	1414.35	7.3
24	3	0	1	5	0.1	1	60.5	1	48	66	170	1.7	22.8374	0	1	1	640.502	3	0.952646	3	5.68	2	4.52	3	2.23	4	0.47	4	114	316	1	6.1	35.9	7.85	143	385	4.44	6.58	2.16	0.98	5.49	2.27	2.352	1.22	40.12	6.74	61.2666	2855.74	6.1
25	4	1	0	5	-	2	18.6	0	48	48.5	153	1.53	20.7185	0	1	1	762.847	3	0.801718	2	5.46	1	3.96	2	1.63	2	0.33	2	72	314	1	2.4	36	18.94	145	557	10.4	5.16	0.63	2.42	2.89	2.26	2.34	1.63	54.03	1.17	10.6353	2251.89	10.2
26	4	0	0	6.73	0.17	0	4.3	1	67	57	165	1.65	20.9366	1	0	1	433.391	2	0.520632	1	6.74	3	3.56	2	2.53	4	0.37	3	117	308	1	6.4	40.7	6.38	47.7	238.7	9.36	7.48	1.7	1.42	5.24	2.32	2.306	1.17	101.86	2.69	24.4521	7.31	9.9
27	1.5	0	0	-	-	1	6.6	1	61	69	170	1.7	23.8754	0	1	0	2534.14	4	5.10119	4	9.42	4	8.31	4	1.01	1	0.62	4	124	308	1	7.9	14.8	20.9	145	721	9.09	11.77	2.43	1.4	10.7	1.75	2.254	1.49	47.06	3.93	35.7237	8187.83	10.5
28	11	0	1	-	-	1	0	0	62	42.5	152	1.52	18.3951	0	1	1	413.404	2	1.26169	3	4.87	1	3.02	1	2.25	4	0.94	4	117	308	1	4.6	23.1	17.68	157.8	330.9	11.59	2.62	1.65	1.11	4.31	2.07	2.408	1.35	48.87	2.03	18.4527	7486.65	7.2
29	25	1	1	6.25	0.06	1	12.6	1	48	82.5	167	1.67	29.5816	0	1	1	841.5	3	0.6875	2	8.25	4	4.95	3	1.8	3	0.25	1	132	306	1	4.5	26.9	5.69	103.7	756.7	5.85	5.17	2.49	1.01	3.11	1.97	2.232	1.38	49.55	3.32	30.1788	6202.88	7.2
30	0.1	0	0	5.53	0.01	0	3.29	1	35	72	170	1.7	24.9135	1	1	1	996.625	4	0.944514	3	6.3	2	4.69	3	1.44	2	0.29	2	115	306	1	2.8	23	5.37	47.1	292.5	4.92	6.08	1.82	0.88	4.87	1.99	2.33	1.25	105.55	2.45	22.2705	7572.66	6.5
31	12	0	0	5.45	-	0	13	1	64	51.5	165	1.65	18.9164	1	0	1	760.189	3	0.919182	2	6.12	2	3.95	2	1.59	2	0.37	3	138	306	1	19.5	38	4.8	55.3	262.2	17.1	4.73	0.8	1.1	3.3	2.1	2.14	1	103.13	3.68	33.4512	15.87	12.2
32	1	0	0	5	-	2	47	1	69	67	170	1.7	23.1834	0	1	1	473.122	2	0.620488	2	4.82	1	3.18	1	2.05	3	0.4	3	75	305	1	8.4	33	6.19	104	285	3.78	4.49	1	1.59	2.41	1.96	2.1	1.44	50.97	6.16	55.9944	3149.18	6.3
33	0.1	0	0	-	0.06	0	0.9	1	26	73.5	173	1.73	24.5581	0	1	1	2204.9	4	3.68688	4	8.75	4	6.94	4	0.96	1	0.51	4	104	305	1	3.5	34.4	10.09	128.3	436.7	11.72	3.24	0.61	1.17	2.05	2.17	2.282	1.21	57.25	1.59	14.4531	5476.84	4.7
34	21	0	1	5	0.1	1	5.8	1	58	76	169	1.69	26.6097	1	1	1	934.915	4	2.60043	4	8.64	4	5.82	4	1.88	3	0.84	4	108	302	1	4.3	36.4	15.15	375	329	7.31	3.18	1.02	0.78	2.3	1.99	2.062	1.64	14.24	19.85	180.437	2387.96	68
35	14	1	1	-	-	1	33.3	1	27	52	160	1.6	20.3125	0	1	1	967.241	4	1.19293	3	6.01	2	3.74	2	1.16	1	0.37	3	99	300	1	5.7	27.1	7.22	132.9	394.8	7.93	3.63	1.26	0.87	1.98	2.03	2.288	1.38	50.1	3.38	30.7242	2195.08	6.7
36	1	0	0	5	-	0	13	1	72	59	173	1.73	19.7133	1	0	0	840.076	3	0.761143	2	4.43	1	2.96	1	1.05	1	0.27	1	137	298	1	17.7	37.4	4.4	54.6	296.4	5.8	5.57	0.64	1.46	3.86	2.21	2.262	1.28	95.92	3.78	34.3602	27.98	6.9
37	1	1	0	-	-	0	0.6	1	61	62	162	1.62	23.6244	0	0	0	618.385	3	0.560282	1	7.37	3	4.42	3	2.13	4	0.27	1	156	298	1	12.3	42.8	4.69	83.2	267	10.42	6.16	1.45	1.78	3.75	2.24	2.184	0.85	117.71	5.64	51.2676	6.09	8.1
38	2	0	0	5	0.05	1	26.5	0	50	47	150	1.5	20.8889	0	1	1	783.159	3	0.762134	2	6.01	2	4.31	3	1.64	3	0.29	2	137	298	1	7	33.8	6.44	132	402	5.07	4.95	0.91	1.92	4.98	2.25	2.374	1.28	53.04	10.75	97.7175	1756.5	5.6
39	1	1	1	-	0.08	2	82.4	1	34	66	168	1.68	23.3844	0	1	1	3056.87	4	2.37527	4	9.52	4	5.68	4	0.55	1	0.23	1	76	296	1	4.8	30.8	13.18	193.5	383.1	2.86	4.38	1.3	1.33	2.74	2.11	2.294	1.54	23.32	5.64	51.2676	4822.08
40	0.4	0	0	6.3	0.03	0	4.6	1	75	64	170	1.7	22.1453	1	0	1	614.47	3	1.18728	3	7.51	3	4.52	3	2.17	4	0.57	4	111	295	1	13.9	43	4	79.1	406.2	5.17	4.26	1.09	1.57	2.2	2.25	2.19	1.42	84.03	2.95	26.8155	5.25	5.7
41	0.9	0	0	-	0.01	1	10.6	1	36	71	174	1.74	23.4509	0	1	1	533.117	2	0.473073	1	6.2	2	3.73	2	2.05	4	0.26	1	115	293	1	10	28.2	3.25	43.4	297.4	6.43	8.07	3.81	1.32	5.4	1.93	2.166	1.15	107.67	4.9	44.541	4840.09	5.4
42	5	0	1	1.07	-	2	50.2	1	44	67	168	1.68	23.7387	1	1	1	734.863	3	0.7775	2	5.99	2	3.11	1	1.24	1	0.31	2	94	293	1	4.1	27.1	13.92	160.7	452.8	7.63	6.27	1.06	1.53	3.83	1.99	2.248	1.23	48.55	3.17	28.8153	4738.37	11.3
43	10	0	1	5	-	2	35.7	0	52	44	156	1.56	18.0802	0	1	1	873.607	4	0.983926	3	6.55	3	4.86	3	1.63	2	0.33	2	100	293	1	4.8	36.8	42.9	864	515	3.6	2.9	1.18	1.1	0.9	2.09	2.154	1.93	7.75	19.12	173.801	4402.13	6.3
44	1	0	0	-	-	0	4.6	1	58	80	154	1.54	33.7325	0	0	0	465.375	2	0.414375	1	4.69	1	2.55	1	1.6	2	0.26	1	111	292	1	5.5	37.6	3.7	56	235	4.74	2.99	0.62	1.05	1.59	2.06	2.108	1.42	87.67	5.61	50.9949	5.81	6.4
45	15	0	1	0.05	0.01	2	79.7	0	70	60	160	1.6	23.4375	0	1	1	534.548	2	0.659032	2	3.99	1	2.27	1	1.24	1	0.36	3	64	292	1	4	34.8	8.66	512	175	3.4	5.06	1.75	1.03	3.33	2.46	2.564	1.85	8.132	1.44	13.0896	1389.09	5.6
46	3	0	0	5	0.01	1	24.4	0	66	56	156	1.56	23.0112	0	1	0	2824.94	4	3.68892	4	11.5	4	6.31	4	0.65	1	0.38	3	71	291	1	3.7	27.8	14.3	129	330	2.94	2.15	0.43	0.53	1.57	2.12	2.364	1.46	39.82	3.22	29.2698	5523.33	11
47	22	0	1	-	-	0	1.5	1	77	60	176	1.76	19.3698	0	0	0	855.737	4	1.14686	3	5.6	2	3.47	2	1.18	1	0.39	3	115	291	1	26	36.7	6.47	51.7	261.8	14.64	4.28	0.76	1.32	2.6	2.08	2.146	0.9	107.13	5.02	45.6318	3.35	9.5
48	12	0	0	-	-	1	3.3	0	51	62	158	1.58	24.8358	0	0	0	330.884	1	0.377826	1	5	1	2.37	1	2.07	4	0.33	2	112	289	2	20.2	44.7	4.85	49.3	339	5.74	4.27	0.72	0.96	3.02	2.29	2.196	1.05	116.08	5.46	49.6314	14.6	6.8
49	16	0	0	-	-	0	0	1	50	75	176	1.76	24.2123	1	0	1	298.711	1	0.311157	1	5.53	1	2.51	1	2.42	4	0.3	2	142	288	2	10.9	44.9	4.85	70.5	482.4	6.95	4.18	2.28	1.12	2.43	2.39	2.292	1.34	132.5	3.96	35.9964	12.77	9.2
50	8	1	1	6.92	-	2	48.5	0	76	56	160	1.6	21.875	0	1	1	407.979	2	0.773014	2	6.09	2	4.18	3	2.92	4	0.54	4	136	285	2	6.1	23.4	11.16	108.8	375.4	10.12	6	1.18	1.06	4.11	2.16	2.492	1.4	79.67	3.19	28.9971	2207.07	15.3
51	6	0	0	-	-	0	30	0	64	60	157	1.57	24.3418	0	0	0	300.753	1	0.531365	1	6.71	3	2.88	1	2.71	4	0.5	4	125	283	2	10	38.5	6.58	34.3	280.4	5.32	3.95	0.87	1.17	2.47	2.43	2.46	1.44	72.62	1.67	15.1803	18.66	7.9
52	4	0	1	5	0.02	0	5	0	52	47	158	1.58	18.8271	0	0	0	695.652	3	0.596273	1	6.05	2	4	2	1.61	2	0.24	1	132	280	2	5.8	35	3.45	40.5	325.2	8.04	4.7	1.65	2.65	1.22	2.15	2.25	1.71	119.39	1.76	15.9984	726.91	12.4
53	3	0	0	-	-	2	80	0	57	56	156	1.56	23.0112	0	1	1	420	2	0.6	1	4.87	1	2.67	1	1.78	3	0.4	3	97	280	2	7.2	22.9	10.2	171	249	3.07	9.78	2.06	1.18	7.34	1.91	2.252	1.57	26.9	3.85	34.9965	8175.36	5.4
54	5	0	1	-	-	0	0	1	51	66	170	1.7	22.8374	1	0	0	313.511	1	0.778139	2	9.87	4	6.18	4	5.48	4	0.69	4	158	278	2	8.4	42.8	5.63	73	330.1	6.44	7.42	1.16	1.13	5.96	2.33	2.274	1.35	91.62	4.02	36.5418	2.74	10.1
55	0.1	0	1	-	-	2	125.4	0	40	55	160	1.6	21.4844	0	0	0	1259.97	4	1.19559	3	7.76	4	5.84	4	1.27	2	0.26	1	67	274	2	4.1	29.9	3.11	38.2	176.5	10.42	2.86	2.2	0.74	1.32	1.9	2.102	0.97	128.48	5.31	48.2679	7.59	8.2
56	5	0	1	5	-	0	3.6	1	69	65	170	1.7	22.4913	1	1	1	771.186	3	1.35593	3	7.46	3	5	3	1.77	3	0.48	4	117	273	2	3.1	30.6	8.72	213.6	382.7	7.18	5.55	9.37	0.61	1.33	2.07	2.258	1.48	28.14	8.98	81.6282	5572.52	11.8
57	10	1	1	-	-	1	10	0	57	60	160	1.6	23.4375	0	1	1	696.679	3	0.998915	3	8.09	4	5.43	4	2.12	4	0.39	3	113	272	2	4.9	26.5	8.06	147	445.4	4.49	5.43	1.81	0.9	3.22	1.94	2.21	1.42	49.24	3.73	33.9057	2916.53
58	8	0	1	20.61	-	1	0.3	1	49			0	#DIV/0!	1	1	1	2134.94	4	3.76755	4	9.98	4	8.32	4	1.06	1	0.48	4	146	272	2	8.9	45.8	5.02	64.9	211.6	5.43	3.14	1.75	0.92	1.71	2.4	2.284	1.31	127.72	2.46	22.3614	31.75	6.8
59	7	0	1	-	-	0	5.5	0	69	65	158	1.58	26.0375	0	0	0	579.196	2	0.91902	2	7.19	3	4.36	3	2.04	3	0.43	3	122	271	2	7.3	40.9	3.59	42.5	320.2	11.64	6.56	3.73	1.24	4.36	2.33	2.312	1.25	111.44	2.48	22.5432	25.08	10.9
60	10	0	0	4.97	0.38	1	16.5	1	63	55	160	1.6	21.4844	1	1	0	363.144	1	0.349694	1	3.97	1	3.08	1	2.29	4	0.26	1	113	270	2	4	22.4	5.7	77.3	539.4	2.71	8.55	3.45	1.23	5.33	1.84	2.192	1.15	65.89	3.86	35.0874	11011.5	8.1
61	1	0	1	-	-	0	1.2	1	37	74	168	1.68	26.2188	0	0	0	726.382	3	0.797919	2	7.12	3	4.76	3	1.73	3	0.29	2	153	264	2	9.6	45.8	4.35	65.4	407.8	11.53	5.34	2.52	1.01	3.33	2.29	2.174	1.12	134.59	3.03	27.5427	10.01	10.6
62	3	0	0	30.44	0.01	2	224.3	1	55			0	#DIV/0!	1	1	1	1129.67	4	1.75442	4	5.27	1	3.68	2	0.86	1	0.41	3	89	264	2	4.6	26.9	6.34	96.6	335	7.13	6.67	1.6	0.98	3.16	1.9	2.162	1.03	93.9	0.39	3.5451	3212.22	8.3
63	1	0	1	-	-	0	0.3	1	44	64	174	1.74	21.1389	1	0	0	440.824	2	0.419034	1	5.38	1	2.95	1	1.76	3	0.25	1	162	263	2	8.7	38	3.2	62	277.5	5.53	3.99	1.01	1.05	2.44	2.1	2.14	1.52	103.13	2.28	20.7252	2.32	10.4
64	0.6	0	1	-	-	0	1.6	1	22	56	167	1.67	20.0796	0	0	0	437.679	2	0.499254	1	7.81	4	4.46	3	2.68	4	0.3	2	143	263	2	10.1	40.9	6.63	47.6	236.4	10.71	3.72	0.83	0.9	2.6	2.24	2.222	1.33	151.23	2.81	25.5429	8.47	12.3
65	0.1	0	0	-	-	0	11.1	1	51	65	169	1.69	22.7583	1	0	0	227.05	1	0.267626	1	5.79	2	2.4	1	2.78	4	0.31	2	175	263	2	15.9	46.1	6.61	73.9	322	15.19	7.74	2.42	0.98	6.1	2.43	2.308	1.07	108.53	4.26	38.7234	3.17	12.8
66	8	0	0	11.37	0.05	2	42.8	1	48	58.5	163	1.63	22.0181	0	1	1	936	4	0.972	3	6.79	3	4.32	3	1.2	1	0.27	1	97	260	2	7	5.8	6.15	81	481.7	3.82	3.65	1.75	1.15	2.06	2.13	2.814	1.17	73.19	1.52	13.8168	6540.78	5.8
67	16	1	1	-	-	0	6.2	1	45	80	169	1.69	28.0102	0	0	1	532.681	2	0.681336	2	7.77	4	4.79	3	2.32	4	0.33	2	151	258	2	11.3	41.7	8.72	79.7	567.4	6.64	5.62	1.37	0.88	4.32	2.39	2.356	1.44	82.32	2.22	20.1798	5.67	9.5
68	28	1	1	-	-	0	3.6	1	71	56	166	1.66	20.3223	1	0	1	971.373	4	0.982712	3	8.9	4	6.69	4	1.77	3	0.26	1	132	257	2	9.8	40.1	5.16	64	355.1	4.37	4.79	1.09	1.08	3.28	2.08	2.078	1.11	94.81	4.35	39.5415	1756.3	7.2
69	8	0	0	-	-	0	2.6	1	43	75	174	1.74	24.7721	1	0	0	534.798	2	0.645087	2	6.02	2	3.6	2	1.73	3	0.31	2	151	257	2	9.7	45.7	6.3	61.5	379.3	7.38	5.57	4.77	0.87	3.26	2.3	2.186	1.38	236.38	3.85	34.9965	6.98	8.5
70	26	1	1	-	-	1	30.7	0	50	62	160	1.6	24.2188	0	1	1	1384.19	4	2.58526	4	8.26	4	6.14	4	1.14	1	0.48	4	127	257	2	16.7	33.8	7	123	388	7.63	3.71	1.6	0.91	2.17	2.15	2.274	0.94	53.49	8.78	79.8102	1458.09	6.6
71	3	0	1	-	-	0	19.9	0	82	58	158	1.58	23.2335	0	0	1	525.198	2	0.868437	2	6.61	3	3.97	2	1.92	3	0.42	3	130	254	2	8.4	38.4	6.13	53.5	278.9	11.14	7.33	1.68	1.42	5.27	2.23	2.262	1.23	89.61	4.59	41.7231	13.85	11.6
72	8	0	0	5	0.08	0	8	1	52	65	170	1.7	22.4913	0	1	1	465.282	2	0.989182	3	5.73	2	4.03	2	2.2	4	0.54	4	113	254	2	6.1	32.1	14.7	121.7	366.6	8.07	6.19	3.15	1.14	5.42	2.16	2.318	1.35	53.8	1.95	17.7255	3284.66	8.8
73	12	0	0	44.79	0.05	0	1.5	0	69	50	150	1.5	22.2222	0	0	0	715.586	3	1.07479	3	7.09	3	4.78	3	1.69	3	0.38	3	142	253	2	10.6	42.7	4.99	36.9	236.3	14.63	5.13	1.34	1.73	3.08	2.41	2.356	1.13	98.21	2.73	24.8157	15.97	10.5
74	1	1	1	-	-	0	1.4	1	65	70	167	1.67	25.0995	0	0	1	832.37	3	1.6779	4	4.99	1	3.29	2	1	1	0.51	4	120	253	2	22.4	39.5	3.42	57	339.2	8.83	3.95	1.41	0.8	2.31	2.35	2.36	0.86	79.87	6.08	55.2672	5.03	8.1
75	16	0	0	26.9	0.07	1	8.5	1	67	64	167	1.67	22.9481	1	1	0	963.297	4	1.53514	4	5.59	2	4.26	3	1.11	1	0.4	3	92	251	2	4.8	20.7	24.38	283.6	507.8	1.66	6.55	0.98	1.32	5.98	1.82	2.206	1.26	27.49	13.83	125.715	7215.66	6.1
76	22	1	1	-	-	0	16.1	0	54	73	160	1.6	28.5156	0	0	1	616.883	3	0.764935	2	5.86	2	3.8	2	1.54	2	0.31	2	144	250	2	14.9	41.2	3.19	35.9	280.3	8.12	5.79	3.22	1.09	3.69	2.13	2.106	1.28	98.21	5.27	47.9043	7.18	9.5
77	5	1	0	5	0.09	2	61.5	1	40	80	170	1.7	27.6817	0	1	1	875.735	4	1.82884	4	7.47	3	5.17	4	1.47	2	0.52	4	80	249	2	3.6	20.3	16.03	319.8	304.6	5.2	5.33	1.49	1.09	3.14	1.87	2.264	1.12	45.92	5.62	51.0858	4990.24
78	1	1	1	1.57	0.01	1	51.6	0	33	45	152	1.52	19.4771	0	1	1	392.261	1	0.759216	2	5.65	2	2.42	1	1.53	2	0.48	4	118	248	2	6.9	29.1	7.07	201	459.8	1.79	11.78	1.72	1.76	10.33	2.05	2.268	1.25	56.83	10.8	98.172	8489.3	7.7
79	10	0	1	2.12	-	0	8.6	1	60	75	170	1.7	25.9516	0	1	1	962.581	4	0.752636	2	8	4	5.11	3	1.29	2	0.19	1	132	243	2	10.1	40.4	6.97	85	354	5.82	9.08	0.71	3.89	4.53	2.05	2.042	1.02	86.74	7.09	64.4481	575.14	6.2
80	18	0	1	-	-	0	5.7	0	50	60	161	1.61	23.1473	0	0	0	245.7	1	0.212333	1	4.05	1	1.82	1	1.8	3	0.21	1	126	243	2	7.4	39.4	4.45	50.1	210.4	12.59	5.74	1.95	1.07	4.04	2.02	2.032	1.19	159.61	3.21	29.1789	13.26	9.9
81	10	1	0	13.44	0.09	1	13	1	57			0	#DIV/0!	1	1	1	321.387	1	0.476129	1	4.21	1	3.28	2	2.48	4	0.36	3	100	243	2	5.2	18.5	7.44	154	327	4.9	7.83	8.88	0.77	2.63	1.88	2.31	1	46.65		0	8486.77	6.2
82	15	1	0	10.92	-	1	46.8	1	61			0	#DIV/0!	1	1	1	455.747	2	0.994016	3	6.18	2	4.67	3	2.49	4	0.53	4	123	243	2	7.5	34.9	7.15	135	358	7.24	6.27	1.62	0.9	5.08	2.28	2.382	0.98	51	6.73	61.1757	1641.67	9.3
83	18	0	1	-	-	0	0.76	1	75	66	172	1.72	22.3094	0	0	1	1031.96	4	2.63299	4	8.92	4	6.54	4	1.54	2	0.62	4	137	243	2	19.5	42	5.55	83.6	227	8.72	4.29	0.96	2.01	2.12	2.38	2.34	1.21	70.05	2.52	22.9068	6.98	8.5
84	10	0	1	-	-	2	108.8	1	55	61	159	1.59	24.1288	0	1	1	1185.53	4	2.25348	4	5.72	2	4.36	3	0.89	1	0.46	3	141	242	2	5.1	28	8.44	155.7	606.9	6.45	5.11	1.98	1.04	3.63	1.98	2.22	1.03	37.5	8.45	76.8105	5740.34	7.6
85	4	0	0	5	-	1	111.1	1	49	61	165	1.65	22.4059	1	1	1	466.226	2	0.982542	3	5.07	1	3.41	2	1.77	3	0.51	4	133	242	2	8.5	38.5	6.92	96	481	4.05	3.7	0.88	1.05	2.35	2.38	2.41	1.43	65.41	3.96	35.9964	692.62
86	12	1	1	5	0.01	2	180.2	0	30	55	158	1.58	22.0317	0	1	1	628.397	3	0.497481	1	5.12	1	3.43	2	1.31	2	0.19	1	116	240	2	7.3	31.3	17.1	128.3	440	9.14	4.9	1.17	1.56	3.45	2.23	2.404	1.54	51.19	1.64	14.9076	4239.13	12.6
87	30	0	1	5	0.13	0	5	1	52	71	175	1.75	23.1837	0	1	1	453.153	2	0.436089	1	6.6	3	3.83	2	2.02	3	0.23	1	123	239	2	4.7	32.9	17.87	430.1	451.6	5.27	5.63	4.52	0.82	2.51	2.05	2.192	1.71	38.58		0	5758.31	9.7
88	0.1	0	0	5	-	1	24.7	1	51	66	162	1.62	25.1486	1	1	1	515.879	2	1.04925	3	7.41	3	4.35	3	1.99	3	0.48	4	118	236	2	6.4	25.1	11.57	181.3	412	11.57	7.04	3.57	0.98	4.36	1.93	2.228	1.5	34.66	16.57	150.621	4261.24	7.1
89	10	1	0	5	-	0	0	1	48	58	172	1.72	19.6052	1	1	1	682.796	3	1.4466	4	8.17	4	5.96	4	2.06	4	0.5	4	157	236	2	7.3	34.6	5.25	76.2	513.7	14.12	4.72	2.36	0.93	3.51	2.16	2.268	1.24	94.16	6.48	58.9032	2675.99	8.4
90	11	0	0	-	-	0	30	1	74	77	160	1.6	30.0781	0	0	1	453.306	2	0.443661	1	5.91	2	3.53	2	1.83	3	0.23	1	130	235	2	16.6	38.4	3.38	34	379.2	7.42	5.03	1.51	1.14	3.41	2.16	2.192	0.83	103.13	4.25	38.6325	2.5	7.4
91	4	0	0	-	-	0	12.9	0	55	46	158	1.58	18.4265	0	0	1	324.46	1	0.400398	1	4.81	1	2.43	1	1.76	3	0.29	2	131	235	2	16	24	4.38	61.9	269.5	4.95	3.82	1	1.65	2.73	2.35	2.67	1.4	116.08	4.83	43.9047	3.96	6.1
92	12	0	0	7.76	0.02	0	4.3	1	78	80	162	1.62	30.4832	0	0	1	773.333	3	1.4	4	6.05	2	4.1	3	1.23	1	0.42	3	123	232	2	5.8	37.1	6.1	72.8	300.5	4.89	3.32	1.04	1.12	1.92	1.95	2.008	1.12	73.28	9.33	84.8097	12.59	6.4
93	0.4	0	1	-	-	1	47.1	1	34	95	180	1.8	29.321	0	1	1	847.548	3	3.3975	4	6.97	3	4.53	3	1.24	1	0.93	4	113	232	2	4	25.4	10.85	322	434	3.81	3.75	2.25	0.78	1.93	1.87	2.162	1.16	36.49	6.38	57.9942	7095.65	8
94	5	0	1	-	-	0	2.3	1	60	56	168	1.68	19.8413	1	0	0	342.928	1	0.475052	1	5.29	1	2.88	1	1.94	3	0.32	2	151	231	2	11.2	43.6	4.64	55.7	288.9	6.56	4.59	0.51	1.8	2.11	2.27	2.198	1.21	86.74	4.54	41.2686	3.82	7.7
95	18	0	1	-	-	1	7.9	1	53	73	168	1.68	25.8645	1	0	1	359.8	1	0.591879	1	5.04	1	2.57	1	1.65	3	0.38	3	150	231	2	9.5	46.7	6.94	64.8	273.7	8.97	2.61	0.63	0.96	1.34	2.27	2.136	1.21	111.44	3.02	27.4518	7.66	8.1
96	7	1	0	5	0.01	0	11.2	1	45	66.5	169	1.69	23.2835	0	1	1	682.474	3	1.26273	3	7.18	3	4.63	3	1.54	2	0.42	3	98	227	3	5.2	22.8	6.16	96	311	3.97	7.89	1.78	1.34	5.01	2.06	2.404	1.18	77.04	3.63	32.9967	6415.07	6.4
97	8	0	1	5	0.01	1	7.1	1	59	52	158	1.58	20.83	0	1	1	799.164	3	1.83068	4	6.69	3	5.14	3	1.46	2	0.52	4	73	227	3	3.31	38.7	10	184.1	417	5.17	9.78	10.52	1.1	3.8	2.18	2.206	1.19	56.83	1.35	12.2715	3202.67	8.1
98	12	0	1	5	-	1	8.1	1	35	76	168	1.68	26.9274	0	1	1	483.205	2	1.25591	3	6.13	2	3.64	2	1.71	3	0.59	4	107	227	3	4.6	24	18.2	466	368	7.65	5.01	2.2	0.62	3.61	1.94	2.26	1.5	10.9	7.17	65.1753	4710.21	6.4
99	11	0	1	5	-	2	0	1	62	55	162	1.62	20.9572	0	1	1	1482.02	4	1.91017	4	9.91	4	7.97	4	1.21	1	0.29	2	100	225	3	5	32	8.8	121	340	5.64	4.91	2.46	1.01	2.76	2.32	2.48	1.2	48.56	2.73	24.8157	3626.83	8.2
100	10	0	0	-	-	0	10.5	0	52	55	158	1.58	22.0317	0	0	0	354.286	1	0.490306	1	5.64	2	3.1	1	1.96	3	0.31	2	144	224	3	6.5	44.2	4.02	44.6	297.4	6.81	6.62	1.98	1.17	4.31	2.31	2.226	1.25	138.98	4.71	42.8139	6.2	9.5
101	0.6	0	0	-	-	0	4.9	1	19	94	173	1.73	31.4077	0	0	0	210.403	1	0.328754	1	6.68	3	2.94	1	3.13	4	0.35	2	167	224	3	67.6	39.5	3.71	60.9	417.1	6.79	4.16	3.96	1.13	2.22	2.21	2.22	1.62	108.53	3.78	34.3602	130.15	11.4
102	20	0	1	-	-	1	23.6	1	74	58	163	1.63	21.83	1	1	1	1920.41	4	1.99862	4	7.77	4	5.04	3	0.58	1	0.23	1	78	221	3	5.8	25.8	5.19	285.5	286.9	6.81	6.5	1.75	1.41	4.14	2.01	2.294	1.38	11.55	4.63	42.0867	2452.09	5.4
103	15	0	1	-	-	0	2.1	0	53	65	162	1.62	24.7676	0	0	1	300.56	1	0.3264	1	4.59	1	2.38	1	1.75	3	0.24	1	117	221	3	7.1	36.7	5.76	51.2	218.7	10.59	5.46	1.1	1.36	3.74	2.25	2.316	1.25	117.71	2.2	19.998	1600.58	12.1
104	20	1	1	-	-	2	53.4	1	62			0	#DIV/0!	1	1	1	691.127	3	1.25091	3	8.68	4	6.88	4	2.2	4	0.4	3	80	221	3	7.8	18.8	6.91	74.6	369	4.46	4.4	0.92	0.89	2.74	1.72	2.144	1.03	107.18	6.64	60.3576	2033.61	9.6
105	0.6	0	0	5	0.05	0	13	1	24	67.5	168	1.68	23.9158	0	0	0	998.049	4	1.08878	3	7.2	3	5.58	4	1.23	1	0.24	1	154	220	3	22.7	41.2	2.56	51.7	237.5	10.7	4.97	0.99	1.27	3.4	2.25	2.226	1.04	153.93	6.95	63.1755	3.25	14.1
106	12	0	1	-	-	1	93.4	0	61	62	160	1.6	24.2188	0	0	1	217.105	1	0.345395	1	5.11	1	2.25	1	2.28	4	0.35	2	132	220	3	7.8	42.3	3.01	43.5	221.5	11.15	5.13	1.35	1.16	3.59	2.32	2.274	1	132.5	5.81	52.8129	4.55	9.1
107	12	0	0	5	0.01	2	134.3	1	43	75	175	1.75	24.4898	0	1	1	483.75	2	0.857557	2	6.99	3	3.87	2	1.76	3	0.39	3	74	220	3	2.6	35.9	24.36	167	604	6.75	3.36	3.63	0.65	1.67	2.33	2.412	1.88	38.49	2.95	26.8155	958.44	8.1
108	0.4	1	1	8.58	0.01	0	5	1	54	90	175	1.75	29.3878	1	1	1	653.256	3	0.715897	2	4.99	1	3.49	2	1.17	1	0.24	1	84	219	3	5.6	37.9	3.75	68	264	4.69	2.39	1.06	0.71	1.4	2.24	2.282	1	82.24	6.52	59.2668	2373.11	7
109	8	1	1	-	-	1	124.3	1	48	63	169	1.69	22.0581	0	1	1	893.638	4	1.38738	3	7.91	4	6.08	4	1.49	2	0.34	2	101	219	3	8.9	30.6	15.06	126.2	465.5	11.05	3.92	1.12	1.07	2.1	2.02	2.208	1.45	40.28		0	3117.71	7.7
110	16	0	1	21.38	0.01	2	33.8	0	54	50	153	1.53	21.3593	0	1	0	696.335	3	1.36723	3	9.71	4	6.55	4	2.06	4	0.43	3	118	219	3	9.8	29.5	7.47	95.8	365.7	11.05	4.82	3.48	1.49	6.64	2.18	2.39	1.31	61.89	2.75	24.9975	5568.36	9.4
111	0.1	0	0	-	0.01	0	3.6	1	78	67	163	1.63	25.2174	1	1	1	934.026	4	2.94282	4	8.35	4	4.99	3	1.17	1	0.69	4	99	219	3	4.2	28.2	4.03	115.5	303.7	4.38	5.63	2.19	1.27	4.01	2.01	2.246	0.95	44.12	3.38	30.7242	6524.61	7.1
112	8	0	0	-	-	1	4.6	1	49	75	173	1.73	25.0593	1	0	0	457.955	2	0.612013	2	5.59	2	3.25	2	1.54	2	0.29	2	137	217	3	6.7	43.1	8.21	79.4	254.8	10.72	4.17	1.15	1.34	2.54	2.32	2.258	1.13	104.43	3.08	27.9972	676.02	13.5
113	2	0	0	-	-	0	5.9	0	54	64	154	1.54	26.986	0	0	0	318	1	0.483594	1	6.06	2	3.18	1	2.17	4	0.33	2	129	217	3	3.7	41.9	4.58	53.7	378.4	7.24	4.23	1.6	1.11	2.53	2.19	2.152	1.48	140.43	2.84	25.8156	28.21	8.2
114	14	1	0	-	-	0	0.6	0	56	66.5	152	1.52	28.7829	0	0	0	410.137	2	0.718213	2	9.02	4	5.5	4	2.91	4	0.38	3	130	217	3	7.4	39.2	5.07	35.2	319.8	7.71	3.85	1.64	0.96	2.21	2.06	2.076	1.06	103.13	1.96	17.8164	20.13	10.4
115	0.1	0	0	-	-	0	6.5	0	50	45	158	1.58	18.026	0	0	0	386.526	1	0.608421	2	6.37	2	3.74	2	2.09	4	0.34	2	135	216	3	17.7	39.8	3.64	49.1	194.7	5.96	4.41	1.54	0.93	2.78	2.16	2.164	1.31	97.05	4.07	36.9963	7.23	11.2
116	21	0	1	16.49	0.01	1	15.7	1	77			0	#DIV/0!	0	1	1	755.212	3	1.8181	4	6.93	3	4.79	3	1.37	2	0.52	4	109	216	3	8.5	30.1	6.79	84	312.9	392.9	3.44	0.92	0.98	2.27	2	2.198	0.98	84.98	5.09	46.2681	3161.16
117	9	0	1	-	-	0	3	1	58	76	178	1.78	23.9869	0	0	0	265.588	1	0.21	1	4.58	1	2.31	1	1.87	3	0.17	1	161	215	3	9.1	43.1	6.45	74.6	337.7	8.14	5.7	1.91	0.91	3.93	2.33	2.268	1.1	116.08	4.22	38.3598	8.6	0
118	17	0	0	-	-	0	1.4	1	65	76	170	1.7	26.2976	1	0	1	289.204	1	0.282478	1	6.06	2	3.04	1	2.26	4	0.21	1	141	215	3	6.8	50.2	4.32	61.7	358.4	6.97	4.47	1.67	0.97	2.93	2.37	2.166	0.94	97.05	4.07	36.9963	9.45	6.5
119	11	0	1	27.83	-	1	1.5	1	69	91	170	1.7	31.4879	0	1	1	852.833	4	2.10233	4	5.35	1	3.57	2	0.9	1	0.53	4	84	215	3	7.2	33	15.04	498.8	306	6.4	40.09	1.39	0.58	2.59	2.12	2.26	2.85	3.91	4.16	37.8144	3639.31
120	9	0	1	-	-	0	1.4	1	63	65	164	1.64	24.1672	0	0	1	443.659	2	0.621951	2	5.58	2	3.4	2	1.64	3	0.3	2	131	214	3	12	42.6	6.51	41.7	380.7	7.31	6.16	1.6	1.19	4.19	2.2	2.148	0.98	117.71	3.93	35.7237	4.15	11.4
121	8	0	1	5	-	1	12	0	58	65	165	1.65	23.8751	0	1	1	587.814	2	0.965891	3	6.21	2	3.56	2	1.29	2	0.35	2	110	213	3	4.8	30	12.8	121.5	340.4	6.62	5.89	0.63	1.59	2.5	2.1	2.3	1.5	65.41	2.14	19.4526	4432.53	7.8
122	2	0	0	5	-	1	8	0	81	52	142	1.42	25.7885	0	0	1	386.209	1	0.888462	2	5.97	2	3.3	2	1.82	3	0.49	4	120	213	3	17.8	39.8	4.11	59.3	641.5	6.27	3.81	1.5	1.15	2.29	2.26	2.264	1	79.08	1.35	12.2715	5.36	7.2
123	9	0	1	3.56	0.01	2	124.6	1	27	69	168	1.68	24.4473	0	1	1	1196.96	4	2.82301	4	9.25	4	6.38	4	1.13	1	0.5	4	83	212	3	3.7	20.4	4.58	118.5	297.1	4.57	3.7	2.73	0.94	4.09	1.77	2.162	1.31	55.21	5.2	47.268	3030	7.4
124	0.6	1	0	24.5	-	3	706.5	1	37			0	#DIV/0!	0	1	1	780.245	3	0.813525	2	7.33	3	5.14	4	1.39	2	0.22	1	93	211	3	5.5	28.4	15.64	352	479	8.4	4.37	0.98	1.21	2.91	1.83	2.062	1.41	15.62	17.41	158.257	5984.78	5.2
125	20	1	1	-	-	0	1.5	1	53	75	168	1.68	26.5731	0	0	1	554.895	2	1.28862	3	7.32	3	4.76	3	1.81	3	0.49	4	138	211	3	8.5	47.2	9.61	63.8	518.8	10.95	3.94	0.84	1.31	2.37	2.4	2.256	1.45	99.4	6.04	54.9036	1521.22	8.8
126	10	1	1	5	0.01	2	52.3	1	59	70	165	1.65	25.7117	0	1	1	536.095	2	1.1856	3	6.46	3	4.33	3	1.68	3	0.46	3	106	208	3	3.9	33.8	15.8	180	461	7.41	9.05	4.16	0.91	2.98	1.9	2.024	1.51	49.51	4.44	40.3596	1395.63	7.3
127	12	0	0	5	0.03	0	1.4	1	73	72.5	170	1.7	25.0865	0	0	1	250.444	1	0.641235	2	4.35	1	1.96	1	1.62	2	0.53	4	121	207	3	11.2	46.9	6.56	90	270.5	5.53	3.47	1.59	0.9	2.02	2.39	2.252	1.11	86.74	1.95	17.7255	14.11	8.2
128	8	0	1	-	-	1	344.8	0	88	56.5	158	1.58	22.6326	0	0	1	689.21	3	0.83642	2	3.99	1	2.71	1	0.81	1	0.25	1	119	206	3	13.6	39.1	4.38	36	257.6	11.34	5.05	1.36	1.07	3.4	2.21	2.228	1.17	73.96	2.7	24.543	1320.02	9.6
129	12	1	0	-	0.01	1	17.2	0	61	58	158	1.58	23.2335	0	1	1	1577.93	4	3.48072	4	8.57	4	6.42	4	0.83	1	0.45	3	93	204	3	9.3	35.7	13	268.4	469.7	5.12	9.3	0.93	1.59	1.62	1.9	1.986	1.23	30.03	17.03	154.803	2160.66	4.3
130	10	1	1	-	-	0	5	1	62	53	170	1.7	18.3391	0	1	1	479.818	2	1.39455	3	5.54	1	3.9	2	1.65	3	0.59	4	119	203	3	2.8	37.8	6.63	137	407	6.48	3.71	3.73	0.79	1.57	2.23	2.274	0.82	46.34	2.06	18.7254	1450.22	7.5
131	15	0	1	5	-	1	3.7	0	74	64	158	1.58	25.6369	0	0	0	440.917	2	1.48428	4	9.94	4	6.33	4	2.9	4	0.68	4	145	202	3	12.1	39.2	3.03	34.2	247.4	13.03	4.56	1.48	1.35	3.02	2.15	2.166	0.93	121.11	3.92	35.6328	20.4	12.5
132	4	0	1	-	-	0	3.4	0	52	48.5	162	1.62	18.4804	0	0	0	327.556	1	0.277037	1	3.95	1	2.2	1	1.35	2	0.17	1	127	201	3	5.4	31.2	2.5	47.8	148.5	7.91	3.25	1.13	1.28	1.46	2.03	2.206	1.1	122.87	2.7	24.543	18.26	16.6
133	20	0	1	5	0.01	2	10.6	0	63			0	#DIV/0!	0	1	1	712.152	3	0.673179	2	7.49	3	5.35	4	1.51	2	0.19	1	87	201	3	7.8	21.5	6.43	89	333	6.35	10.25	1.95	1.35	6.89	1.9	2.27	1.04	83.17		0	6861.86	8.4
134	12	0	0	5	0.01	0	8.5	0	64	52.5	153	1.53	22.4273	0	1	1	661.429	3	0.926	2	7.35	3	4.63	3	1.4	2	0.28	2	104	200	3	3.7	39.3	6.49	76	324	8.58	6.95	1.74	1.7	4.2	2.05	2.064	0.95	63.47		0	1982.25	8.5
135	2	1	0	5	0.01	2	266.1	0	66	53	158	1.58	21.2306	0	1	1	263.377	1	0.518774	1	4.66	1	2.82	1	2.12	4	0.39	3	107	198	3	6.2	35.2	6.6	119	393	6.21	2.86	1.53	0.97	1.43	2.12	2.216	1.23	57.25	2.63	23.9067	3887.99
136	4	0	1	-	-	0	5	1	32	54	172	1.72	18.2531	0	0	0	237.292	1	0.527315	1	6.48	3	3.08	1	2.57	4	0.44	3	141	198	3	15.5	45.7	7.95	34.1	312.7	15.78	4.58	0.88	0.99	3.04	2.4	2.286	1.1	124.69	2.02	18.3618	13.26	8.7
137	15	0	1	14.06	-	0	5	0	58	57.5	160	1.6	22.4609	0	0	0	185.061	1	0.216061	1	5.8	2	2.48	1	2.64	4	0.23	1	120	197	3	4.2	40.6	4.07	39.5	251.8	9.73	5.17	2.12	1.31	2.88	2.21	2.198	1.22	165.7	4.75	43.1775	11.11	7.2
138	14	1	1	-	-	0	3.4	1	63	63.5	168	1.68	22.4986	1	0	0	1551.92	4	3.46622	4	8.57	4	7.09	4	0.9	1	0.44	3	137	197	3	11.3	41.7	8.06	56.1	194.4	6.31	6.82	1.57	2	4.68	2.27	2.236	1.2	98.21	3.12	28.3608	8.96	9.7
139	15	0	1	6.64	0.01	1	4.7	1	59			0	#DIV/0!	0	1	1	1037.68	4	1.1175	3	6.25	2	4.47	3	0.84	1	0.21	1	98	195	3	2.8	25.7	14.38	152.5	430.7	9.33	9.69	1.33	1.73	6.91	2.51	2.796	0.77	44.18	15.37	139.713	3531.98	13.3
140	16	0	0	5	-	0	0.5	0	64	49	160	1.6	19.1406	0	0	1	283.443	1	0.465137	1	5.16	1	2.66	1	1.83	3	0.32	2	116	195	3	7.5	45.1	6.7	77.6	236	4.86	5.47	0.92	1.75	3.39	2.28	2.178	0.98	79.04	3.93	35.7237	9.68	6.7
141	3	0	0	-	0.01	0	0.14	1	60	71	173	1.73	23.7228	1	1	1	782.467	3	0.927667	2	7.63	3	4.84	3	1.2	1	0.23	1	96	194	4	5.1	28	9.9	167.1	34.6	5.08	6.14	2.11	0.88	2.58	2.09	2.33	1.37	49.33	1.5	13.635	569.35
142	7	1	1	5	0.01	2	57.5	0	29	80	160	1.6	31.25	0	1	1	478.471	2	1.47981	4	7.63	3	5.13	3	2.08	4	0.6	4	120	194	3	5.1	30.1	14.85	311	493.2	5.15	6	2.94	1.5	3.58	2.13	2.328	1.32	22.8	16.89	153.53	4705.03	8.6
143	4	0	0	-	-	0	4.3	1	45	60	163	1.63	22.5827	1	0	0	314.446	1	1.14048	3	8.97	4	4.79	3	2.94	4	0.7	4	146	193	4	5.5	40.3	6.46	70.5	302.2	8.05	4.47	1.69	0.9	2.92	2.2	2.194	1.19	84.03	3.41	30.9969	2.94	7.4
144	3	0	1	-	-	0	8	0	26	35	150	1.5	15.5556	0	0	0	345.536	1	0.452273	1	6.67	3	3.98	2	2.2	4	0.25	1	126	191	4	8.1	45	3.97	31.4	271.2	12.64	4.88	1.66	1.11	3.46	2.39	2.29	1.34	143.65	2.35	21.3615	15.06	8.9
145	20	1	1	5	0.01	0	0.4	0	59	45	150	1.5	20	0	1	1	497.462	2	0.605377	2	4.87	1	2.79	1	1.06	1	0.23	1	145	189	4	22.5	42.4	7.33	164.2	328.8	3.57	3.24	1.56	1.17	1.56	2.42	2.372	1.32	56.71	2.97	26.9973	109	6.3
146	21	0	0	5	0.01	0	11.9	1	64	69	173	1.73	23.0546	1	1	1	964.112	4	1.58135	4	6.83	3	4.54	3	0.89	1	0.31	2	60	189	4	4.3	27.8	16.51	174.1	384.5	6.27	6.09	1.1	2.06	3.64	1.99	2.234	1.26	29.43	9.36	85.0824	4869.19	6.1
147	15	0	1	-	-	0	0.2	1	47	70	173	1.73	23.3887	1	1	1	561.408	2	1.39609	4	7.77	4	5.02	3	1.69	3	0.47	4	152	189	4	10.2	40.7	6.64	414	503.5	5.01	3.58	1.67	0.65	2.39	2.28	2.266	1.42	49.34	5.5	49.995	722.27	5.2
148	18	0	1	-	-	0	5	1	46	77	172	1.72	26.0276	1	1	1	744.142	3	0.884925	2	7.39	3	5.39	4	1.34	2	0.22	1	117	185	4	13.4	32.7	5.8	72.8	367	2.97	2.86	0.77	1.41	1.11	2.17	2.316	1	85.15	4.81	43.7229	1768.61	7.2
149	22	1	1	-	-	0	2.6	1	65	68.5	170	1.7	23.7024	0	1	1	432.396	2	0.981657	3	6.58	3	3.95	2	1.69	3	0.42	3	109	185	4	55.8	34	9.48	98	451	4.47	9.99	2.6	0.98	7.06	2.28	2.4	1.27	80.62	3.21	29.1789	5682.58
150	20	0	1	15.83	0.06	3	3608.1	1	60	71	163	1.63	26.7229	0	1	1	906.041	4	2.16662	4	9.4	4	7.14	4	1.45	2	0.44	3	106	184	4	6.5	29.7	16	171	338	3.93	5.07	1.68	1.38	2.65	2.11	2.316	1.48	51.16		0	10839.8
151	22	1	1	-	-	0	3	0	50	62.5	158	1.58	25.0361	0	0	0	148.354	1	0.210777	1	4.19	1	1.67	1	2.06	4	0.26	1	125	183	4	8.1	41.1	5.9	44.6	385.1	9.8	3.22	0.66	0.99	1.97	2.18	2.158	1.51	99.4	2.7	24.543	7.3	9.5
152	22	1	1	9.84	0.03	0	4.1	0	80	48	150	1.5	21.3333	0	0	1	934.317	4	2.16803	4	9.4	4	7.33	4	1.42	2	0.42	3	128	181	4	19	38	4.02	65.1	271.9	7.44	3.63	1.58	1.07	1.92	2.26	2.3	1.19	102.46	2.61	23.7249	7.34	6.1
153	20	0	1	7.83	-	2	111.3	0	73	64	156	1.56	26.2985	0	1	1	839.699	3	1.17276	3	8.65	4	5.77	4	1.23	1	0.25	1	103	179	4	4.5	18.7	10.9	82	428	5.19	5.29	1.83	1.24	2.96	1.93	2.356	1.49	47.29	3.32	30.1788	8396.38	9.6
154	14	0	1	-	-	1	9.7	1	64	78	171	1.71	26.6749	0	1	1	807.264	3	1.96115	4	9.35	4	6.75	4	1.48	2	0.43	3	152	177	4	12.8	39.5	6.4	80	438	9.78	3.66	1.32	1.01	2.4	2.14	2.15	0.91	84.03	1.86	16.9074	1397.96	9.1
155	9	0	0	-	-	2	54.9	0	61	62	158	1.58	24.8358	0	0	1	504.054	2	0.830544	2	6.37	3	4.21	3	1.47	2	0.29	2	123	176	4	3.9	37.7	4.34	53.2	196.3	6.88	3.57	1.22	0.94	1.97	2.06	2.106	1.37	91.62	5.54	50.3586	11.26	7.1
156	21	0	0	5	0.04	0	4.4	0	74	72	168	1.68	25.5102	0	0	0	1134.9	4	2.83724	4	7.07	3	5.61	4	0.87	1	0.44	3	132	176	4	16.4	38.5	2.38	47.9	116.3	8.59	3.73	0.7	1.68	1.62	2.15	2.18	0.56	162.6	5.85	53.1765	23.78	6.8
157	2	0	1	-	-	0	13	1	43	41	161	1.61	15.8173	1	0	0	283.453	1	0.821368	2	5.66	2	3.06	1	1.9	3	0.51	4	136	176	4	15.8	33	4.9	36.8	143	12.5	8.07	1.17	1.43	6.11	2.16	2.3	1.31	112.94	2.85	25.9065	6.87	14.1
158	1	0	1	-	-	0	4.7	1	47	55	178	1.78	17.3589	1	0	0	620.297	3	1.1697	3	9.76	4	7.16	4	2.02	3	0.33	2	134	175	4	5	36.4	6.13	52.8	252.5	6.65	2.94	1.04	0.94	1.73	2.21	2.282	1.35	172.24	3.91	35.5419	4.57	12
159	3	1	1	5	0.01	0	5	0	26	73.5	170	1.7	25.4325	0	1	1	811.719	3	1.41579	4	9.71	4	8.07	4	1.71	3	0.3	2	105	172	4	4.1	21.8	9.44	80.9	337.2	4.85	4.21	1.33	0.89	2.72	1.83	2.194	1.39	96.57	3.05	27.7245	5937.11	6.7
160	0.5	0	0	-	-	0	13	1	70	76	172	1.72	25.6896	0	0	1	233.752	1	0.423761	1	5.71	2	2.98	1	2.18	4	0.31	2	134	171	4	18.5	44.5	3.7	63.1	367.2	5.96	3.26	0.88	1.14	1.76	2.4	2.31	0.83	84.92	3.87	35.1783	4.66	9.1
161	4	1	1	-	-	0	10.2	1	64	65	162	1.62	24.7676	1	0	1	310.647	1	0.529928	1	4.62	1	2.54	1	1.39	2	0.29	2	110	170	4	9	43.6	6.38	86.3	392.7	8.07	2.74	1.45	0.76	1.36	2.28	2.208	1.44	73.28	2.42	21.9978	4.5	8.5
162	14	1	1	-	-	0	1.9	0	65	50	155	1.55	20.8117	0	0	0	361.151	1	0.705205	2	5.09	1	3.12	1	1.46	2	0.33	2	139	169	4	8.4	40.4	3.91	27.4	232.7	15.17	5.32	1.07	1.14	3.68	2.23	2.222	1.06	162.6	4.52	41.0868	7.44	12.2
163	3	1	1	5	-	0	5.1	0	56	55	163	1.63	20.7008	0	1	1	632.228	3	1.26446	3	6.02	2	3.87	2	1.01	1	0.33	2	126	165	4	11.4	44.5	13.76	144.8	510	5.38	4.87	0.99	1.09	3.71	2.19	2.1	1.24	40.08	7.53	68.4477	65.42	6.8
164	2	0	0	20.4	0.01	0	4.1	0	63	62.5	156	1.56	25.6821	0	1	1	668.839	3	1.49982	4	7.55	3	4.54	3	1.12	1	0.37	3	92	165	4	4.3	27.1	33.76	897.8	465.3	4.71	3.54	0.78	1.09	2.11	1.6	1.858	2.2	20.52	38.1	346.329	3818.41	6
165	12	0	1	1.31	-	1	18.5	0	45	64	158	1.58	25.6369	0	1	1	418.239	2	1.06461	3	8.72	4	5.83	4	2.3	4	0.42	3	127	165	4	15.3	39.1	6.18	76	311.9	13.83	5.93	2.09	1.85	3.11	2.19	2.208	1	100.42	3.4	30.906	1575.27	9.1
166	5	1	0	5	-	1	15.2	0	60	53.5	150	1.5	23.7778	0	1	1	326	1	0.48	1	4.99	1	3.3	2	1.65	3	0.24	1	85	163	4	2	24.9	7.8	155	314	4.84	4.07	1.28	0.97	2.65	2.29	2.592	1.44	39.82		0	4937.89	6.2
167	0.1	0	1	-	-	1	4.5	1	45	74	178	1.78	23.3556	1	0	1	501.074	2	0.83	2	7.24	3	4.98	3	1.62	2	0.27	1	161	163	4	18.6	49.5	8.21	86.4	333.1	19.34	4.68	1.73	0.82	3.27	2.41	2.22	1.02	75.36	3.89	35.3601	14.29	8.7
168	0.1	0	0	-	-	0	1.3	0	71	71	160	1.6	27.7344	0	0	1	393.75	1	1.09375	3	5.66	2	3.5	2	1.44	2	0.45	3	115	162	4	9	37.7	8.96	56.4	393.1	7.55	3.93	0.92	1.4	2.32	2.39	2.436	1.48	47.65	2.88	26.1792	1090.26	8
169	10	0	1	-	-	0	6.1	1	63	84	168	1.68	29.7619	0	0	0	475.039	2	0.682868	2	5.63	2	3.83	2	1.29	2	0.23	1	159	160	4	7.8	44	5.73	74.5	294.8	12.27	8.66	14.58	1.11	1.77	2.23	2.15	0.65	83.17	6.74	61.2666	4.79	10.3
170	4	0	0	-	-	0	5.2	0	59	56	154	1.54	23.6128	0	0	1	290.164	1	0.936604	3	5.32	1	2.92	1	1.59	2	0.51	4	124	158	4	4.9	42.8	4.11	61.6	364.2	5.41	2.68	2.24	0.99	0.97	2.32	2.264	1.31	99.4	3.4	30.906	4.14	6.4
171	0.6	1	0	5	0.01	0	5	1	48	87.5	180	1.8	27.0062	1	1	1	617.131	3	1.10062	3	7.33	3	5.11	3	1.3	2	0.28	2	116	157	4	13.1	40.2	4.16	44.7	192.9	3.59	3.86	1.06	1.75	1.83	2.31	2.306	1.19	111.22	2.97	26.9973	1221.91	10.7
172	8	1	1	5	0.01	2	43.7	1	73	60	165	1.65	22.0386	1	1	1	479.874	2	1.28374	3	9.5	4	7.03	4	2.3	4	0.42	3	129	157	4	2.9	31.8	8.75	111.4	421.7	7.78	4.35	8.43	0.57	1.4	1.92	2.084	0.61	62.45	8.41	76.4469	3363.15	7.6
173	12	0	1	-	-	0	8.4	0	52	78	160	1.6	30.4688	0	0	1	215.101	1	0.391093	1	6.59	3	3.45	2	2.47	4	0.28	2	131	154	4	10.9	40.8	7.72	68.6	404.1	13.64	3.1	2.64	0.92	1.59	2.33	2.314	1.15	93.72	3.75	34.0875	4.76	11.6
174	11	0	1	6.27	0.13	1	27.1	1	44	73	169	1.69	25.5593	0	1	1	608.143	3	0.993697	3	7.54	3	4.73	3	1.19	1	0.25	1	102	153	4	3.9	24.5	4.17	87	279	7.8	10.23	2.54	0.54	3.69	2.03	2.34	1.12	97.92	0.71	6.4539	6422.56	9.1
175	0.6	0	0	5	-	1	5.7	1	63	69	175	1.75	22.5306	1	1	1	993.506	4	2.5974	4	8.25	4	5	3	0.77	1	0.4	3	86	153	4	7.3	24.7	9.34	84.9	350.2	4.45	6.65	1.52	1.94	3.93	1.93	2.236	1.33	89.2	7.75	70.4475	6401	5.7
176	5	0	1	-	-	0	2.7	1	45	70	172	1.72	23.6614	1	0	0	345.381	1	0.690761	2	7.37	3	4.86	3	1.97	3	0.28	2	154	140	4	10	37.2	6	56	263	11.66	4.23	1.25	1.1	2.64	2.14	2.196	1.16	124.69	1.9	17.271	3.94	14.7
177	22	0	0	-	-	0	3.4	1	69	68	173	1.73	22.7204	0	0	1	290.732	1	0.520714	1	3.99	1	2.43	1	1.12	1	0.24	1	120	134	4	9.9	41.7	6.73	60.6	264.2	8.72	5.68	1.04	1.57	3.89	2.22	2.186	1.28	99.4	2.76	25.0884	3.6	9.1
178	13	0	1	-	-	0	2.5	1	49	59	163	1.63	22.2063	0	0	1	165.683	1	0.225931	1	3.61	1	1.82	1	1.45	2	0.18	1	161	132	4	12.5	40.6	3.8	63.2	389.3	12.06	3.93	1.18	0.98	2.57	2.28	2.268	1.38	122.87	2.73	24.8157	4.26	9.1
179	15	0	1	61.32-13.74-5	0.19-0.06	0	8.4	1	73	46	160	1.6	17.9688	1	0	0	661.238	3	1.96857	4	4.41	1	3.18	1	0.63	1	0.39	3	111	131	4	12.3	36.9	3.5	82.9	232	5.84	3.46	1.05	0.79	1.92	2.16	2.222	0.85	119.39	2.12	19.2708	7.07	12.6
180	11	1	1	5	0.08	2	33	1	42	67	168	1.68	23.7387	1	1	1	805.708	3	2.11333	4	8.78	4	6.34	4	0.96	1	0.32	2	96	122	4	8.6	24.4	13.5	129	431.8	20.3	4.81	1.51	1.71	3.48	2.12	2.432	1.22	53.27	3.04	27.6336	2734.56
181	11	1	1	14.58	-	0	5	1	29	86	173	1.73	28.7347	0	1	1	430.112	2	1.0036	3	4.98	1	3.19	2	0.89	1	0.28	2	87	120	4	3.9	29	11.39	123	378	8.23	6.86	1.84	1.66	3.6	1.95	2.17	1.45	41.17	6.31	57.3579	3674.87	5.4
182	1	0	1	-	-	0	0.5	1	79	61	171	1.71	20.8611	1	0	0	178.284	1	0.26355	1	4.6	1	2.62	1	1.69	3	0.17	1	139	115	4	6.7	38	5.5	41.9	233.3	9.03	5.2	1.41	1.13	3.25	2.24	2.28	1.02	119.39	3.41	30.9969	7.31	15.7
183	11	0	1	5	-	0	0.7	1	72	77	168	1.68	27.2817	0	0	1	113.081	1	0.2445	1	3.76	1	1.63	1	1.6	2	0.24	1	156	111	4	12.2	43.8	5.36	73.2	44.8	5.81	5.86	1.47	1.2	4.29	2.25	2.174	0.81	101.86	5.31	48.2679	11.43	8.3
184	5	0	0	-	0.11	1	60.5	1	51	56.5	168	1.68	20.0184	1	1	1	583.591	2	2.31333	4	5.78	2	3.47	2	0.66	1	0.44	3	103	111	4	14.3	23.2	12.38	123.3	477.5	4.23	6.69	1.7	0.75	5.52	1.71	2.046	0.99	62.83	10.8	98.172	10155.9	6.3
185	0.5	0	1	-	-	0	3.1	1	42	50	175	1.75	16.3265	0	0	0	413.94	2	1.36714	3	4.52	1	3.19	2	0.84	1	0.36	2	150	109	4	8.4	38.5	3.99	55.2	208.4	13.54	5.89	1.98	1.05	3.76	2.01	2.04	1.04	114.49	4.03	36.6327	8.26	15.8
186	12	0	1	-	0.06	0	13	1	53	80	158	1.58	32.0461	1	1	1	199.435	1	0.817684	2	5.64	2	3.53	2	1.77	3	0.41	3	85	100	4	10.7	26	5.38	102	354.9	4.61	5.4	2.19	0.87	3.81	1.98	2.26	1.32	74.53		0	4180.1
187	6	1	0	5	-	1	11.2	1	57	60	175	1.75	19.5918	1	1	1	181.019	1	0.414381	1	3.64	1	2.29	1	1.05	1	0.19	1	102	83	4	8.7	34.1	11.4	118	473	9.88	4.94	1.21	1.15	3.17	2.21	2.328	1.34	73.28	2.36	21.4524	3127.81	8.8
188	4	0	1	5	-	1	26.4	1	66	75	169	1.69	26.2596	1	1	1	248.589	1	1.37772	3	7.95	4	6.05	4	2.02	3	0.46	4	102	83	4	11.4	34.7	36.71	627	186	7.61	5.64	1.02	1.32	1.4	1.96	2.066	1.07	19.52	5.57	50.6313	1974.5	6.7
189	2	0	0	＜5	0.03	1	22.5	1	65	77	170	1.7	26.6436	1	0	1	419.034	2	0.779597	2	5.72	2	3.63	2	1.49	2	0.32	2	144	172	4	12.7	41.8	3.88	49.4	265.6	7.14	3.71	1.08	0.93	2.61	2.11	2.07	1.11	116.08	4.29	38.9961	2107.14	6.3
190	10	0	0	-	-	0	3.6	1	69	77	171	1.71	26.3329	1	0	1	373.97	1	0.73497	2	6	2	3.61	2	1.67	3	0.34	2	142	173	4	17.2	42.8	4.75	70.3	446.6	5.7	3.47	0.79	1.23	1.98	2.35	2.29	1.03	100.61	5.01	45.5409	630.53	7
191	5	0	0	-	-	0	3.4	0	62	55	155	1.55	22.8928	0	0	0	486	2	0.44	1	4.71	1	2.74	1	1.37	2	0.22	1	127	243	2	9.4	44.8	5.77	48.2	274.3	8.3	3.03	0.99	1.57	1.2	2.16	2.06	1.43	99.4		0	6.01	7.7
192	0.1	0	0	＜5	0.03	0	0.6	0	77	58	150	1.5	25.7778	0	0	1	1648.89	4	2.39152	4	7.22	3	5.79	4	0.92	1	0.38	3	118	262	2	8.5	38.1	3.19	62	304	6.53	3.03	1.63	0.87	1.5	2.13	2.17	0.79	60.44	8.2	74.538	3495.5	6.9
193	9	1	1	44.71	0.07	0	3.4	1	56	50	162	1.62	19.052	0	0	0	816.729	3	1.40958	4	8.02	4	5.97	4	1.44	2	0.34	2	126	197	3	11.9	36	3.39	54.7	161.3	11.1	5.28	1.13	1.83	3.02	2.1	2.8712	0.64	87.67	2.55	23.1795	4418.91	13.8
194	13	0	0	-	-	0	3.7	0	75	59	152	1.52	25.5367	0	0	1	554.487	2	0.517306	1	5.73	2	3.12	1	1.93	3	0.32	2	101	343	1	4.6	37.3	5.87	46.4	280	5.79	5.26	1.17	0.79	4.17	2.34	3.1014	1.32	81.49	3.11	28.2699	898.64	7.8
195	14	1	0	-	-	1	23.7	1	58	80	183	1.83	23.8884	0	0	0	224.9	1	0.299	1	4.47	1	2.21	1	1.7	3	0.23	1	139	173	4	13.9	47.6	5.19	81.2	363.8	8.32	5.38	0.93	1.57	3.44	2.64	3.406	1.17	95.92	5	45.45	6.79	8
196	15	1	1	-	-	0	4.9	1	67	67	165	1.65	24.6097	1	0	1	574.556	2	0.721805	2	6.05	2	3.84	2	1.33	2	0.25	1	151	199	3	7	42.9	8.72	96.9	393.9	7.74	5.16	1.56	0.87	3.36	2.41	3.1834	1.5	67.08	2	18.18	1805.41	7.4
197	3	0	0	-	-	0	1.1	1	71	76	160	1.6	29.6875	0	0	1	342	1	0.433756	1	6.02	2	3.42	2	2.05	3	0.26	1	151	205	3	21.4	47.7	4.38	72.9	335.6	8.14	5.29	2.35	1.34	3.54	2.48	3.239	1.23	73.96	5.29	48.0861	319.57	8.5
198	10	0	1	27.1	-	0	7.4	1	72	66	164	1.64	24.539	1	0	0	765.6	3	0.616	2	4.74	1	2.97	1	1.35	2	0.28	2	98	348	1	5.1	25.4	3.88	33.5	165	6.26	4.05	0.39	1.72	1.84	1.91	2.683	0.88	122.87	3.87	35.1783	3540.35	13.9
199	2	0	1	56.35	24.99	3	39.5	0	30	50	156	1.56	20.5457	0	0	1	505.585	2	0.554717	1	5.97	2	3.36	2	2.12	4	0.35	2	119	319	1	12	36.1	4.34	37.9	192.2	15.32	4.37	0.87	1.06	3.03	2.2	2.9576	0.91	108.53	3.66	33.2694	3245.72	14.6
200	13	0	0	-	-	0	6.8	0	62	67	166	1.66	24.3141	0	0	1	426.521	2	1.35192	3	9.6	4	5.56	4	2.92	4	0.71	4	130	224	3	18	47.4	4.12	51.9	422.5	5.95	4.55	1.19	1.95	2.78	2.28	3.0216	0.86	114.49	7.91	71.9019	594.38	7.1
[truncated: 3 more columns]
